# Supplementary material for: Asymmetrical Oscillating Morphology Hydrodynamic Performance of a Novel Bionic Pectoral Fin
Source: MDPI journal article supplement (doi:10.3390/jmse10020289), 2022-02-19
Supplement: s1 [file s1]

## Supplementary Material

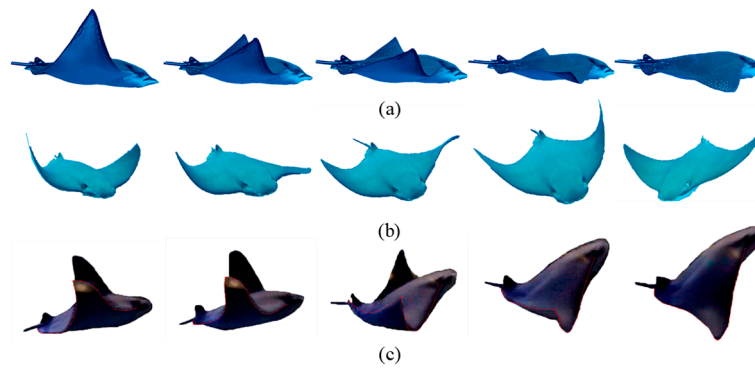

**Figure S1.** Free swimming of MPF model fish. (a) Eagle ray forward swimming, shot at Sanya Atlantis Aquarium. (b) Cownose ray turn swimming, shot at Sanya Atlantis Aquarium. (c) Cownose ray pitch swimming, shot at Beijing Aquarium. Adapted from the Ph.D. dissertation of Cao Yong (2015, Beihang University)[28].

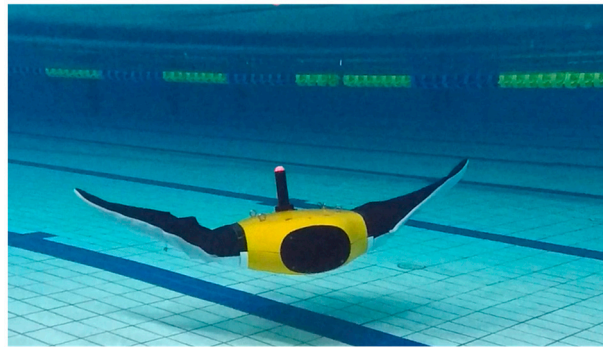

**Figure S2.** The complete underwater robot.
